# Supplementary material for: Electrosynthesis of NH3 from low-concentration NO on cascade dual-site catalysts in neutral media
Source: Research Square preprint supplement (doi:10.21203/rs.3.rs-6497629/v1), 2025-04-24
Supplement: Supplementary file 1 [file 7959c7e168711f08a5b55661.docx]

**Supplementary Information**

**Electrosynthesis of NH3 from low-concentration NO on cascade dual-site catalysts in neutral media**

Xiaoxi Guo,1,‡ Tongwei Wu,3,‡ Hengfeng Li,2 Yanning Zhang,3 Chao Ma,4 Hongmei Li,1 Liyuan Chai,5 Haitao Zhao6 and Min Liu1,5*

1Hunan Joint International Research Center for Carbon Dioxide Resource Utilization, State Key Laboratory of Powder Metallurgy, School of Physics, Central South University, Changsha, 410083, China.

2School of Materials Science and Engineering, Central South University, Changsha, 410083, China.

3Institute of Fundamental and Frontier Sciences, University of Electronic Science and Technology of China, Chengdu 610054, Sichuan, China.

4College of Materials Science and Engineering, Hunan University, Changsha 410082, China.

5School of Metallurgy and Environment, Central South University, Changsha 410083, China

6Department of Electrical and Electronic Engineering, The Hong Kong Polytechnic University, Hong Kong, China

‡X. Guo and T. Wu contributed equally to this work.

*Correspondence and requests for materials should be addressed to M.L. (email: minliu@csu.edu.cn)

**Experimental Section:**

**Material characterizations**

XRD patterns were collected by a LabX XRD-6100 X-ray diffractometer with Cu Kα radiation (40 kV, 30 mA) of wavelength 0.154 nm (SHIMADZU, Japan). TEM images were acquired on a Hitachi H-8100 electron microscopy (HITACHI, Japan), equipped with EDS mapping. XPS measurements were conducted on an ESCALABMK II X-ray photoelectron spectrometer using Mg as the exciting source. *In situ* electrochemical ATR-FTIR spectra were obtained by using a Thermo iS50. The XAS spectra were performed at the BL11B beamline of Shanghai Synchrotron Radiation Facility (SSRF). The incident photons were monochromatized by a Si (111) double-crystal monochromator. The absorbance data of spectrophotometer were measured on SHIMADZU UV-1800 ultraviolet-visible (UV-Vis) spectrophotometer.


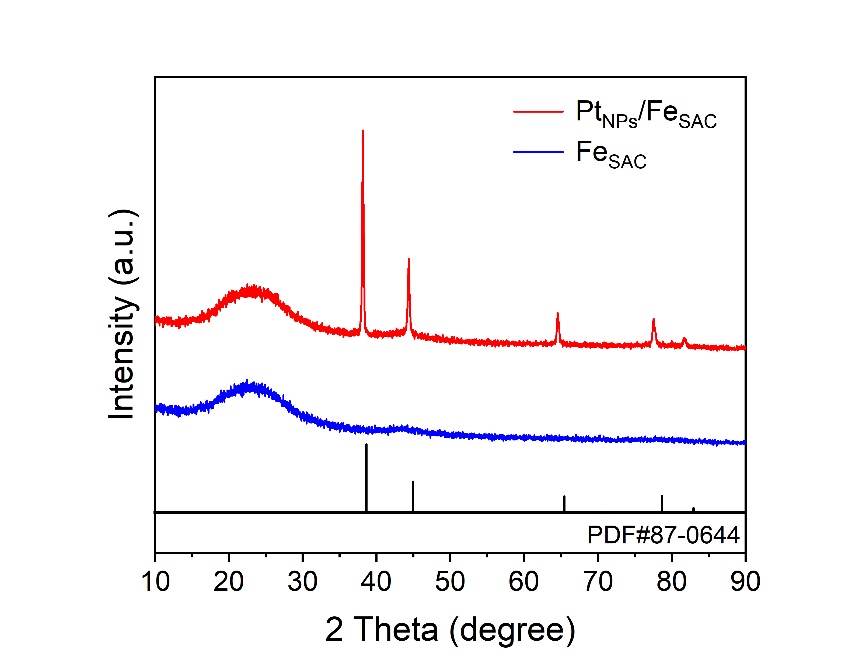


**Supplementary Fig. 1 |** XRD patterns for PtNPs/FeSAC and FeSAC.


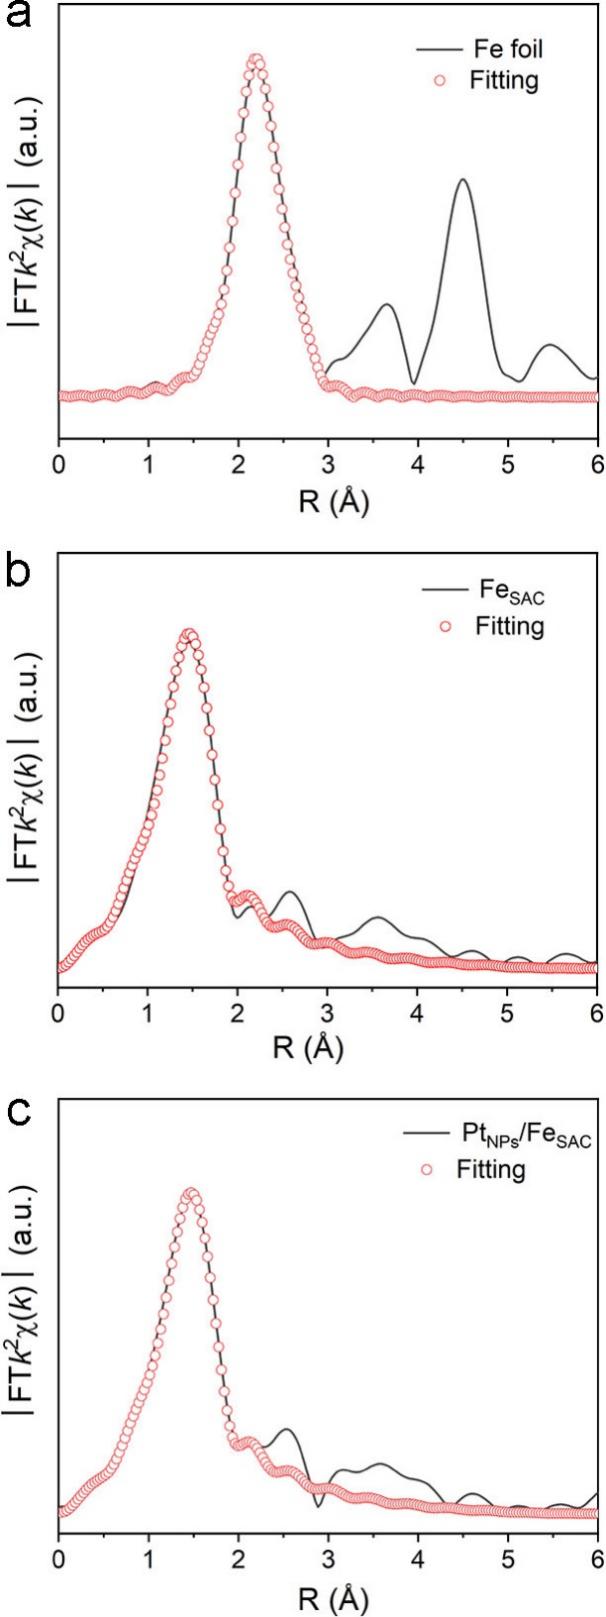


**Supplementary Fig. 2 |** FT-EXAFS fitting curves of Fe foil, FeSAC and PtNPs/FeSAC.


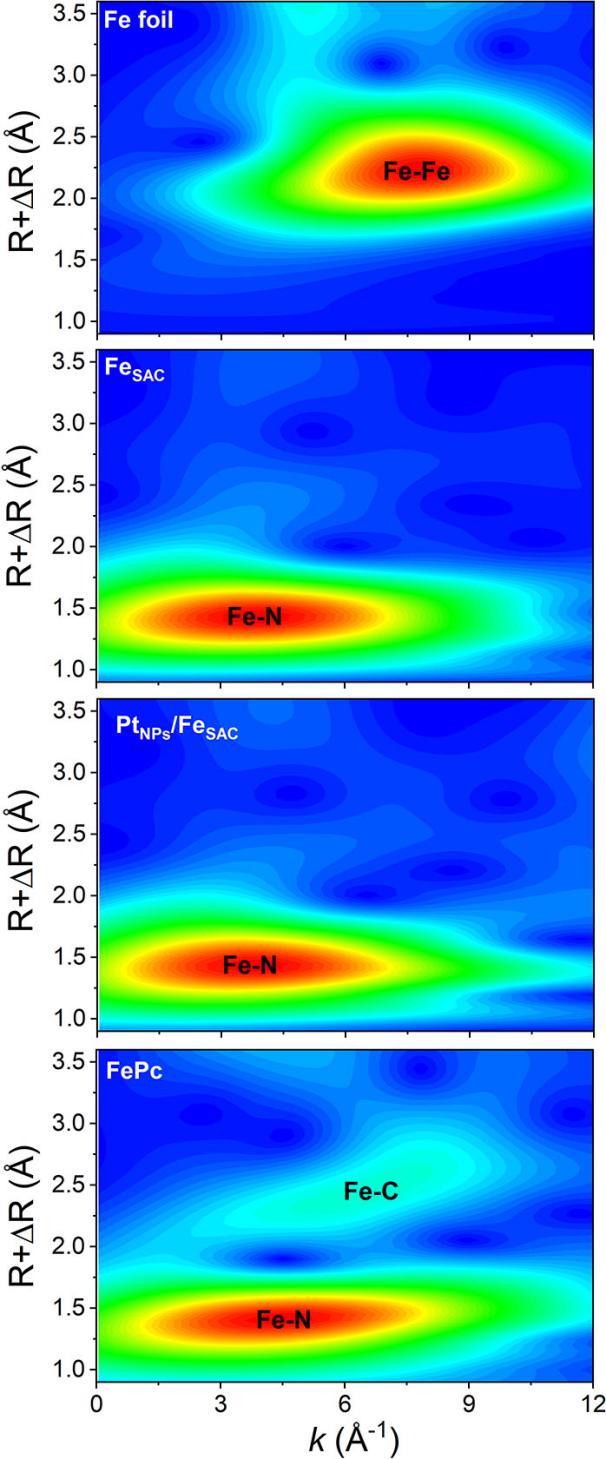


**Supplementary Fig. 3 |** WT contour spectra of Fe atom in FeSAC, PtNPs/FeSAC and reference samples.


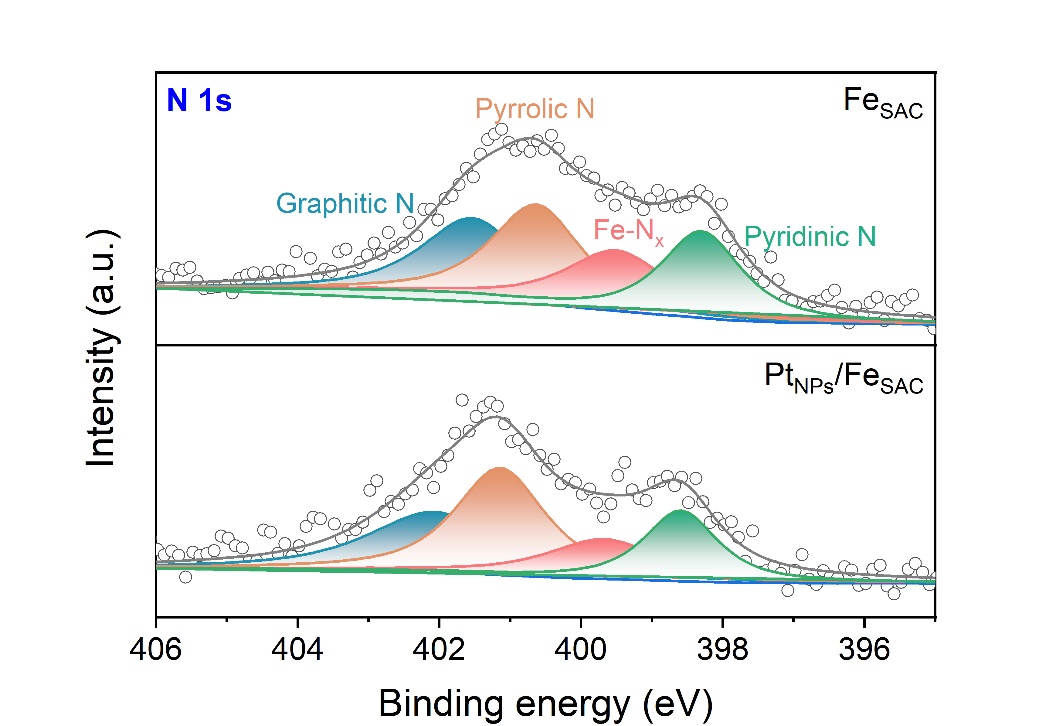


**Supplementary Fig. 4 |** XPS spectra of PtNPs/FeSAC and FeSAC in N 1s region


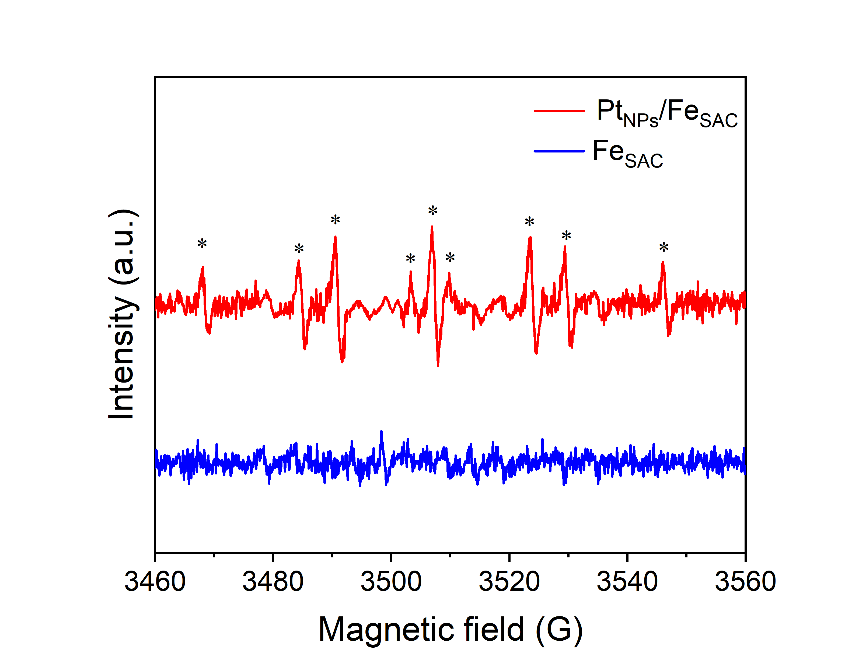


**Supplementary Fig. 5 |** The DMPO-involved EPR spectra of PtNPs/FeSAC and FeSAC collected after 10 min electrolysis at -0.6 V and -0.7 V, respectively, under Ar atmosphere.


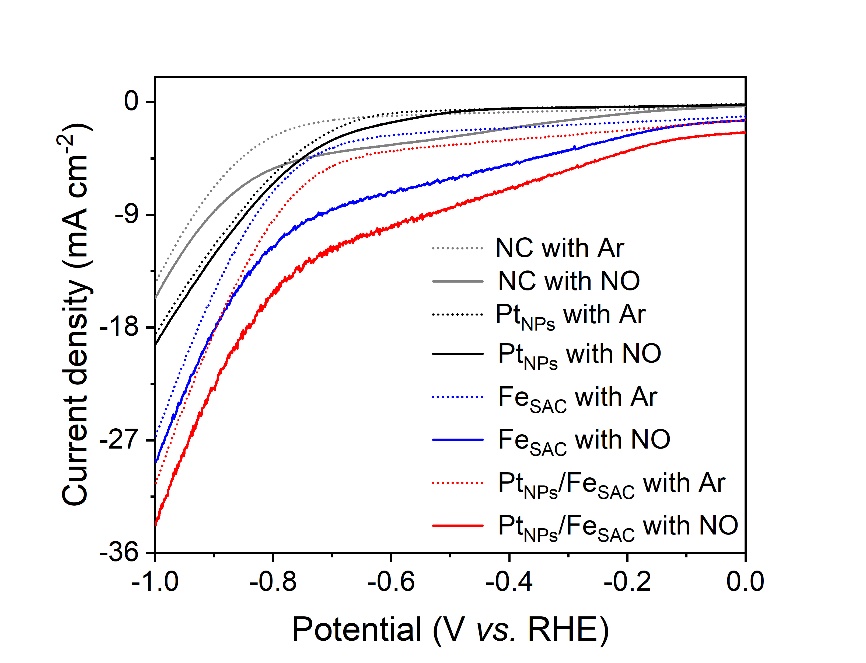


**Supplementary Fig. 6 |** LSV curves of NC, PtNPs, FeSAC and PtNPs/FeSAC in Ar- and 1 vol% NO-saturated 0.5 M K2SO4 electrolyte.


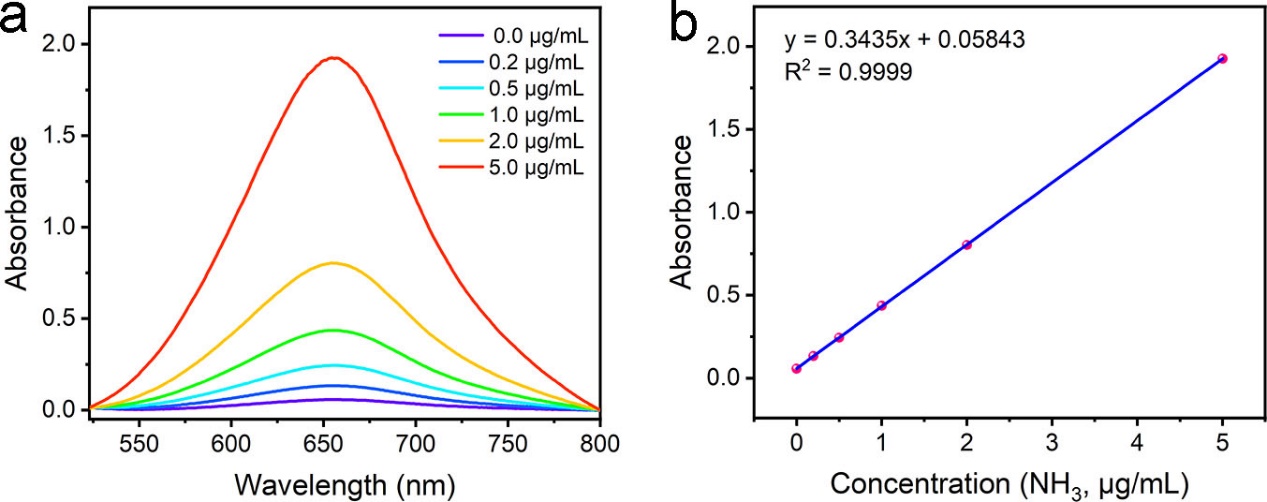


**Supplementary Fig. 7 |** UV-Vis absorption spectra of indophenol assays with NH3 after incubated for 2 h at room temperature. (b) Calibration curve used for assessment of NH3 concentrations.


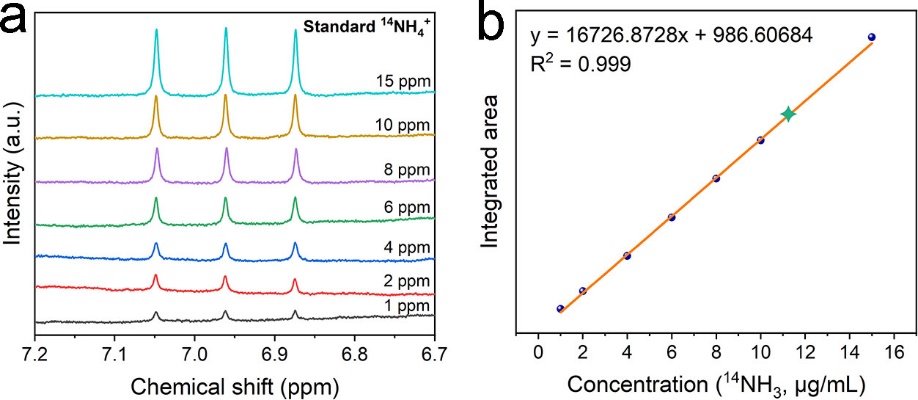


**Supplementary Fig. 8 |** (a) 1H NMR spectra of standard NH3 solution. (b) The standard curve of NMR integral area against NH3 concentration.

Before 1H NMR measurements, the electrolyte after electrolysis was diluted 2 times with 1 M HCl to adjust the Ph to acidic. Then, 100 mL DMSO-d6 was added in 500 μL acidified electrolyte.


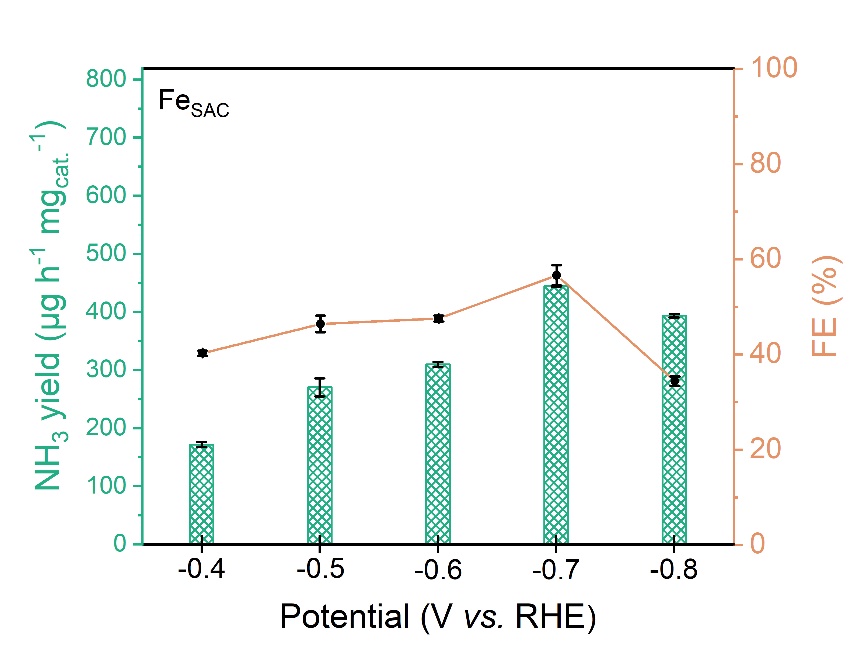


**Supplementary Fig. 9 |** NH3 yield and FE of FeSAC.


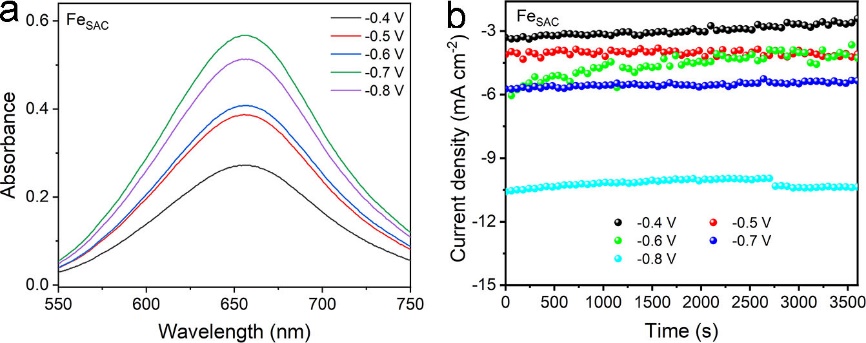


**Supplementary Fig. 10 |** Electrochemical NORR measurements over FeSAC. (a) UV-Vis absorption spectra at various potentials after dilute 10 times. (b) I-t curves at various potentials for 1 h.


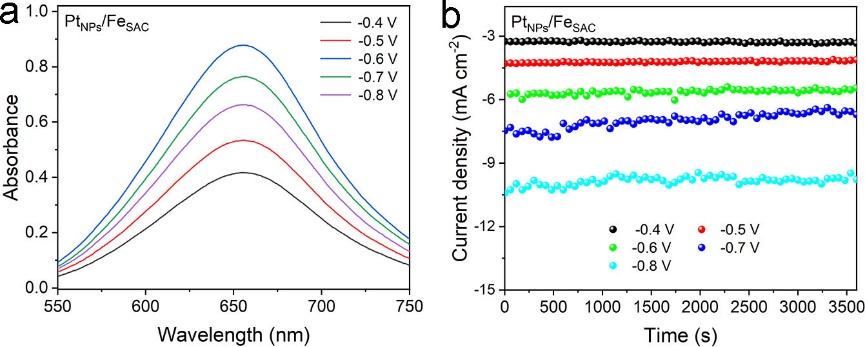


**Supplementary Fig. 11** **|** Electrochemical NORR measurements over PtNPs/FeSAC. (a) UV-Vis absorption spectra at various potentials after dilute 10 times. (b) I-t curves at various potentials for 1 h.


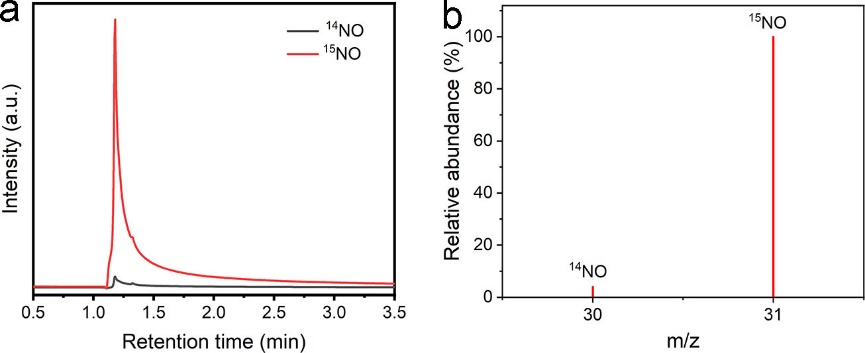


**Supplementary Fig. 12** **|** The prepared 1% vol NO gas characterization. (a) Gas chromatograms. (b) Mass spectrum.

According to the following equation, the laboratory-prepared 15NO was collected in a gas sample bag and confirmed by GC-Mass analysis. As shown in Figure S12, a single intense peak at m/z=31 was observed in the profile.

3 Na15NO2+H2SO4→2 15NO↑+Na15NO3+Na2SO4+H2O


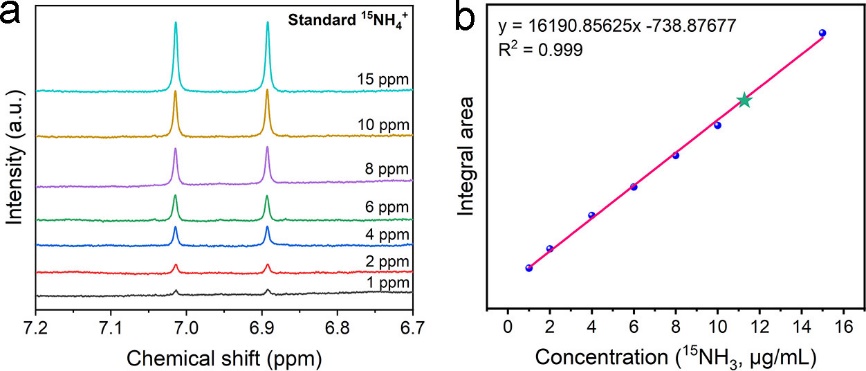


**Supplementary Fig. 13** **|** (a) 1H NMR spectra of standard NH3 solution. (b) The standard curve of NMR integral area against NH3 concentration.


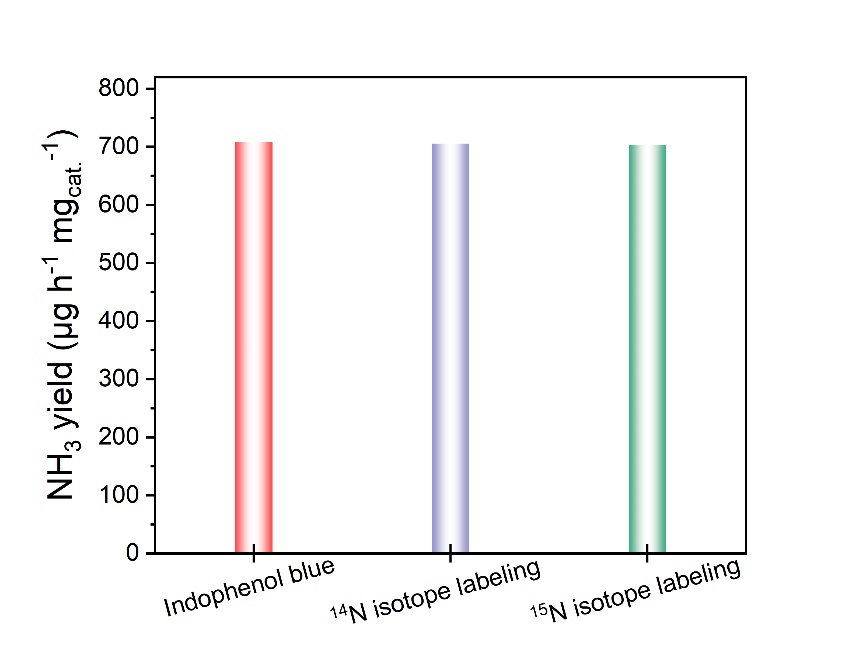


**Supplementary Fig. 14** **|** The comparison between indophenol blue method and NMR method on NH3 yield.


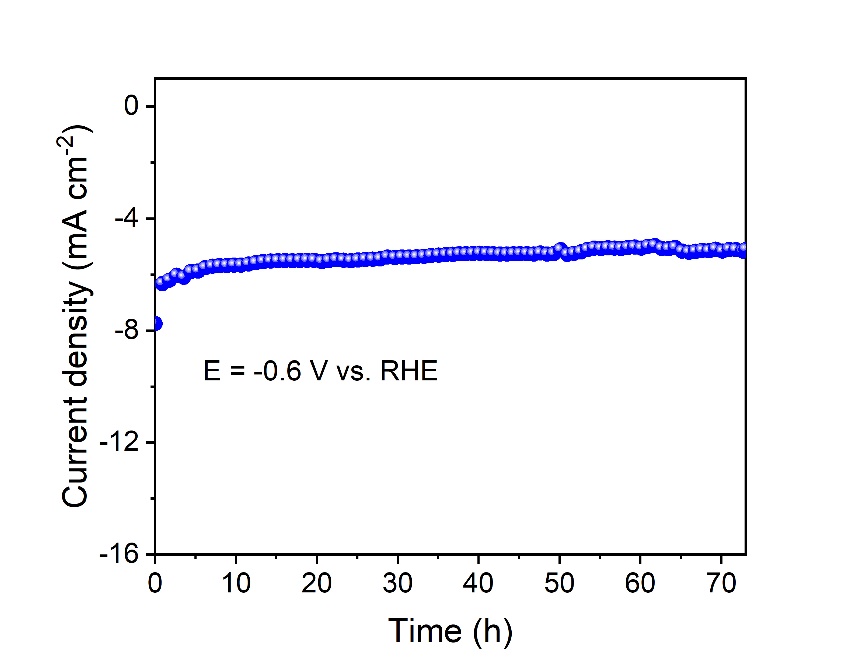


**Supplementary Fig. 15** **|** Long-term stability test of PtNPs/FeSAC at -0.6 V.


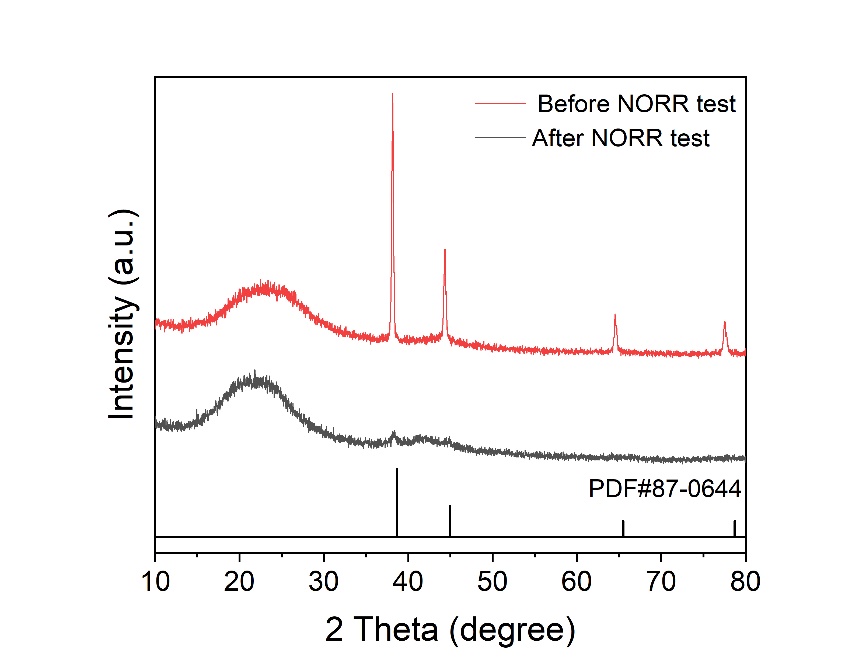


**Supplementary Fig. 16** **|** XRD patterns of PtNPs/FeSAC before and after NORR test.


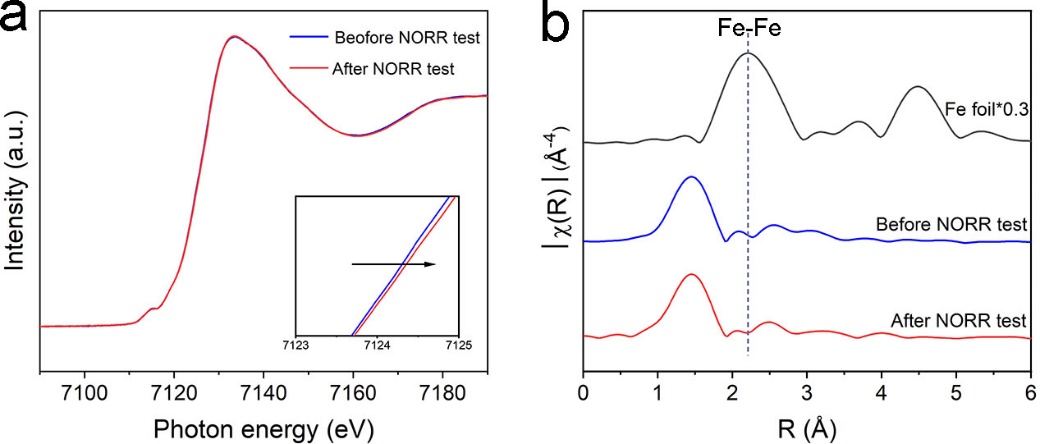


**Supplementary Fig. 17** **|** (a) Fe K-edge XANES spectra of PtNPs/FeSAC before and after NORR test. (b) FT-EXAFS spectra at Fe K-edge.


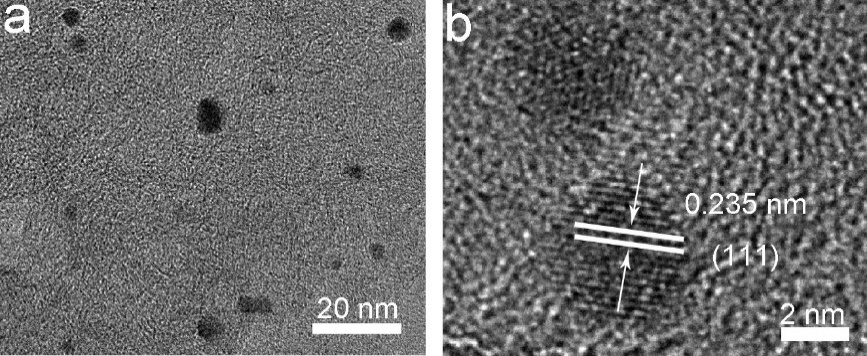


**Supplementary Fig. 18** **|** (a) TEM and (b) HRTEM of AuNPs/FeSAC.


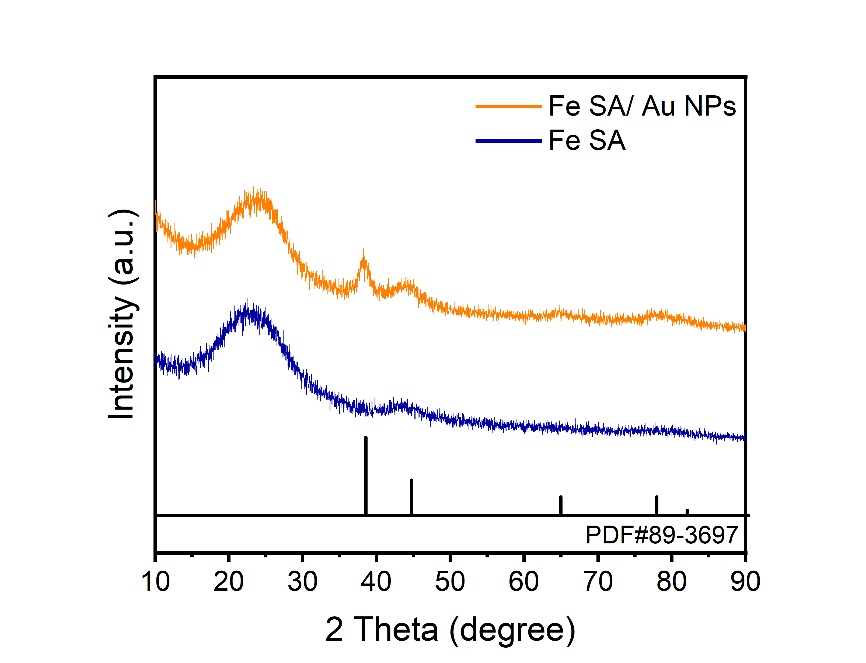


**Supplementary Fig. 19** **|** XRD patterns for AuNPs/FeSAC and FeSAC.


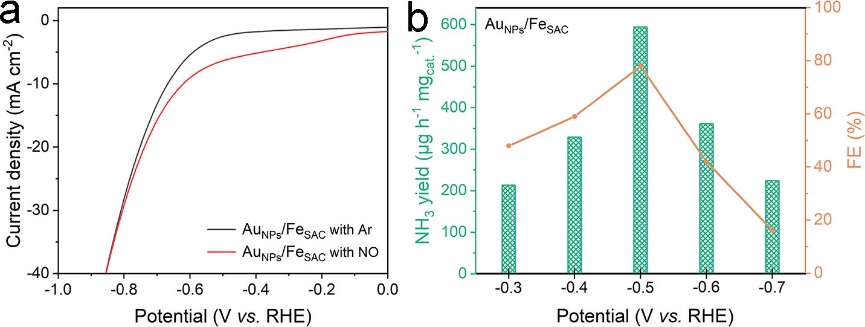


**Supplementary Fig. 20** **|** (a) LSV curves of AuNPs/FeSAC in Ar- and 1 vol% NO-saturated 0.5 M K2SO4. (b) NH3 yield and FE with 1 vol% NO over AuNPs/FeSAC at each given potential.

**Supplementary Table 1.** Fe and Pt content of FeSAC and PtNPs/FeSAC catalysts determined by ICP-OES.

| Catalyst | Fe (wt%) | Pt (wt%) |
| --- | --- | --- |
| FeSAC | 0.66 | ND |
| PtNPs/FeSAC | 0.62 | 0.84 |

**Supplementary Table 2.** EXAFS fitting parameters at the Fe K-edge.

| Sample | Shell | *CNa* | *R*(Å)*b* | *σ*2(Å2)*c* | Δ*E*0 (eV)*d* | *R* factor |
| --- | --- | --- | --- | --- | --- | --- |
| Fe foil | Fe-Fe | 8* | 2.47±0.01 | 0.0051 | 6.6±1.0 | 0.0037 |
| Fe-Fe | 6* | 2.85±0.01 | 0.0064 |
| FeSAC | Fe-N | 4.4±0.3 | 1.96±0.01 | 0.0085 | -5.6±2.0 | 0.0086 |
| PtNPs/FeSAC | Fe-N | 4.2±0.2 | 1.97±0.01 | 0.0091 | -4.9±1.5 | 0.0051 |

**Supplementary Table 3** The Fe and Pt content after long-term stability test of FeSAC and PtNPs/FeSAC catalysts determined by ICP-OES.

| Electrolyte | Fe (mg/L) | Pt (mg/L) |
| --- | --- | --- |
| FeSAC after NORR test | 0.15 | ND |
| Pt NPs/FeSAC after NORR test | 0.04 | 0.19 |
| Before NORR test | ND | ND |

**Table S4.** Comparison of NORR performance of Pt NPs/FeSAC with other reported catalysts.

| **Catalyst** | **Electrolyte** | ***c*NO** | **Potential (V)** | **Performance** | **Ref.** |
| --- | --- | --- | --- | --- | --- |
| Pt NPs/FeSAC | 0.5 M K2SO4 + 50 mM SB | 1 vol% | -0.6 | Y=709.7 μg h-1mg-1  FE=90.3% | This work |
| / | 1.6 V vs. cell voltage | Y=3123.8 μg h-1 mg-1  FE=94.5% |
| **Ni@NC** | 0.1 M HCl | 99.9 vol% | 0.16 | Y= 1233.2 μg mg-1 h-1  FE=92.5% | *Adv. Sci.* 2022, 9, 2201410 |
| **TiO2-x** | 0.2 M PBS | 10 vol% | -0.4 | Y=588.2 μg mg-1 h-1  FE=72.3% | *Small* 2023*,* 19, 2300291 |
| **MoS2/GF** | 0.1 M HCl +0.5 mM FeIISB | 10 vol% | -0.7 | Y=281.1 μg mg-1 h-1  FE=76.6% | *Angew. Chem. Int. Ed.* 2021, 60, 25263–25268 |
| **Cu@Co** | 0.1 M Na2SO4 | 1 vol% | -0.5 | Y=78.4 μg mg-1 h-1  FE=76.54% | *Adv. Mater.* 2024, 36, 2309470 |
| **FeOCl-VCl** | 0.1 M HCl+50 mM SB | 1.0 vol% | -0.5 | Y=455.4 μg mg-1 h-1  FE=91.06% | *Angew. Chem. Int. Ed.* 2024, 63, e202318792 |
| **Ru0.05Cu0.95** | 0.5 M Na2SO4 | 25 vol% | -1.1 | Y=300.6 μg mg-1 h-1  FE=64.9% | *Sci. China Chem.* 2021, 64, 1493–1497 |
| **CuFe DS/NC** | 0.1 M Na2SO4 | 99.9 vol% | -0.6 | Y=3188.1 μg mg-1 h-1  FE=90% | *Adv. Mater.* 2024, 36, 2309470 |
| **Ru-LCN** | 0.5 M Na2SO4 | 1 vol% | -0.2 | Y=765.3 μg mg-1 h-1  FE=65.96% | *ACS Energy Lett.* 2022, 7, 1187−1194 |
| **MnO2-x NA/TM** | 0.2 M Na2SO4 | 10 vol% | -0.7 | Y=153.0 μg mg-1 h-1  FE=82.8% | *Mater. Today Phys.* 2022, *22*, 100586. |
| **Bi@C** | 0.1 M Na2SO4 | 10 vol% | -0.4 | Y= 1592.5 μg mg-1 h-1  FE=93% | *Nano Res.* 2022, 15, 5032-5037 |
| **Ni2P/CP** | 0.1 M HCl | 10 vol% | 0.16 | Y= 406.4 μg mg-1 h-1  FE=76.9% | *J. Mater. Chem. A* 2021, 9, 24268- 24275 |
| **NiFe-LDH/NSA** | 0.25 M Li2SO4 | 99.9 vol% | -0.7 | Y=1904.0 μg mg-1 h-1  FE=82.0% | *Chem. Commun.* 2022, 58, 8097-8100 |
| **Au-BNC** | 0.1 M HCl | 99.9 vol% | -0.6 | Y=1877.4 μg mg-1 h-1  FE= 94.7% | *Nano Res.* 2024, 17. 1151–1164 |
